# Supplementary material
Source: PubMed Central journal article supplement (PMC3183817)
Supplement: NIHMS316794-supplement-01.pdf [file NIHMS316794-supplement-01.pdf]

**Table S1:** Regions showing significant different values in the ICC-d25 between the pre- and the post-anesthesia periods

| MNI coord (mm)           |     |     | Talairach coord (mm) |     |     | T values | Cluster size |   | Brain region           | Brodmann Area |
|--------------------------|-----|-----|----------------------|-----|-----|----------|--------------|---|------------------------|---------------|
| x                        | y   | z   | x                    | y   | z   |          |              |   |                        |               |
| <i>Positive clusters</i> |     |     |                      |     |     |          |              |   |                        |               |
| 9                        | 36  | -3  | 8                    | 32  | -1  | 5.07     | 7            | R | Anterior Cingulate     | BA 24         |
| -15                      | 51  | -21 | -15                  | 45  | -21 | 4.07     | 5            | L | Middle Frontal Gyrus   | BA 11         |
| <i>Negative clusters</i> |     |     |                      |     |     |          |              |   |                        |               |
| 15                       | -63 | 21  | 15                   | -60 | 22  | 4.71     | 5            | R | Precuneus              | BA 31         |
| 51                       | -33 | 18  | 49                   | -32 | 19  | 4.46     | 10           | R | Insula                 | BA 13         |
| 0                        | -3  | 42  | 0                    | -1  | 39  | 4.46     | 9            | L | Cingulate Gyrus        | BA 24         |
| 21                       | -96 | 9   | 21                   | -92 | 12  | 4.32     | 6            | R | Middle Occipital Gyrus | BA 18         |
| -45                      | 6   | 0   | -43                  | 2   | 3   | 4.05     | 8            | L | Insula                 | BA 13         |
| -54                      | -24 | 18  | -52                  | -24 | 19  | 3.87     | 7            | L | Postcentral Gyrus      | BA 40         |
| 18                       | -45 | 3   | 18                   | -44 | 6   | 3.72     | 6            | R | Parahippocampal Gyrus  | BA 30         |

**Table S2:** Regions showing significant different values in the ICC-p25 between the pre- and the post-anesthesia periods

| MNI coord (mm)           |     |     | Talairach coord (mm) |     |     | T values | Cluster size |   | Brain region           | Brodmann Area |
|--------------------------|-----|-----|----------------------|-----|-----|----------|--------------|---|------------------------|---------------|
| x                        | y   | z   | x                    | y   | z   |          |              |   |                        |               |
| <i>Positive clusters</i> |     |     |                      |     |     |          |              |   |                        |               |
| 9                        | 36  | -3  | 8                    | 32  | -1  | 4.82     | 7            | R | Anterior Cingulate     | BA 24         |
| 42                       | 42  | 30  | 41                   | 43  | 29  | 4.28     | 5            | R | Superior Frontal Gyrus | BA 9          |
| -12                      | 54  | -24 | -12                  | 48  | -24 | 3.86     | 7            | L | Orbital Gyrus          | BA 11         |
| <i>Negative clusters</i> |     |     |                      |     |     |          |              |   |                        |               |
| 18                       | -63 | 18  | 18                   | -61 | 19  | 4.47     | 6            | R | Posterior Cingulate    | BA 31         |
| 0                        | -3  | 42  | 0                    | -1  | 39  | 4.32     | 7            | L | Cingulate Gyrus        | BA 24         |
| 21                       | -96 | 9   | 21                   | -92 | 12  | 4.26     | 6            | R | Middle Occipital Gyrus | BA 18         |
| -45                      | 6   | 0   | -43                  | 2   | 3   | 4.21     | 9            | L | Insula                 | BA 13         |
| 57                       | -36 | 21  | 55                   | -35 | 22  | 3.51     | 9            | R | Insula                 | BA 13         |
| 18                       | -48 | -3  | 18                   | -48 | 1   | 3.77     | 9            | R | Lingual Gyrus          |               |

**Table S3:** Regions showing significant different values in the ICC-p00 between the pre- and the post-anesthesia periods

| MNI coord (mm)           |     |     | Talairach coord (mm) |     |     | T values | Cluster size |   | Brain region             | Brodmann Area |
|--------------------------|-----|-----|----------------------|-----|-----|----------|--------------|---|--------------------------|---------------|
| x                        | y   | z   | x                    | y   | z   |          |              |   |                          |               |
| <i>Positive clusters</i> |     |     |                      |     |     |          |              |   |                          |               |
| -51                      | 6   | -30 | -49                  | 1   | -23 | 8.01     | 8            | L | Middle Temporal Gyrus    | BA 21         |
| 9                        | 36  | -3  | 8                    | 32  | -1  | 5.66     | 7            | R | Anterior Cingulate       | BA 24         |
| 57                       | -48 | 18  | 56                   | -47 | 20  | 4.9      | 5            | R | Supramarginal Gyrus      | BA 40         |
| -15                      | 51  | -21 | -15                  | 45  | -21 | 3.96     | 6            | L | Middle Frontal Gyrus     | BA 11         |
| -6                       | 57  | 33  | -6                   | 55  | 29  | 3.64     | 5            | L | Superior Frontal Gyrus   | BA 9          |
| 33                       | -78 | 27  | 34                   | -74 | 27  | 3.44     | 5            | R | Superior Occipital Gyrus | BA 19         |
| <i>Negative clusters</i> |     |     |                      |     |     |          |              |   |                          |               |
| 48                       | -33 | 15  | 46                   | -32 | 17  | 4.5      | 11           | R | Superior Temporal Gyrus  |               |
| 21                       | -96 | 9   | 21                   | -92 | 12  | 4.44     | 6            | R | Middle Occipital Gyrus   | BA 18         |
| -45                      | 6   | 0   | -43                  | 2   | 3   | 4.3      | 9            | L | Insula                   | BA 13         |
| 0                        | -3  | 42  | 0                    | -1  | 39  | 4.24     | 8            | L | Cingulate Gyrus          | BA 24         |
| -60                      | -24 | 18  | -57                  | -24 | 19  | 4.15     | 7            | L | Postcentral Gyrus        | BA 40         |
| 18                       | -48 | -3  | 18                   | -48 | 1   | 3.77     | 9            | R | Lingual Gyrus            |               |
